# Supplementary material for: Untargeted metabolomics using liquid chromatography coupled with mass spectrometry for rapid discovery of metabolite biomarkers to reveal therapeutic effects ofPsoralea corylifoliaseeds against osteoporosis
Source: Royal Society of Chemistry journal article supplement (doi:10.1039/c9ra07382e), 2019-01-01
Supplement: c9ra07382e1.pdf [file c9ra07382e1.pdf]

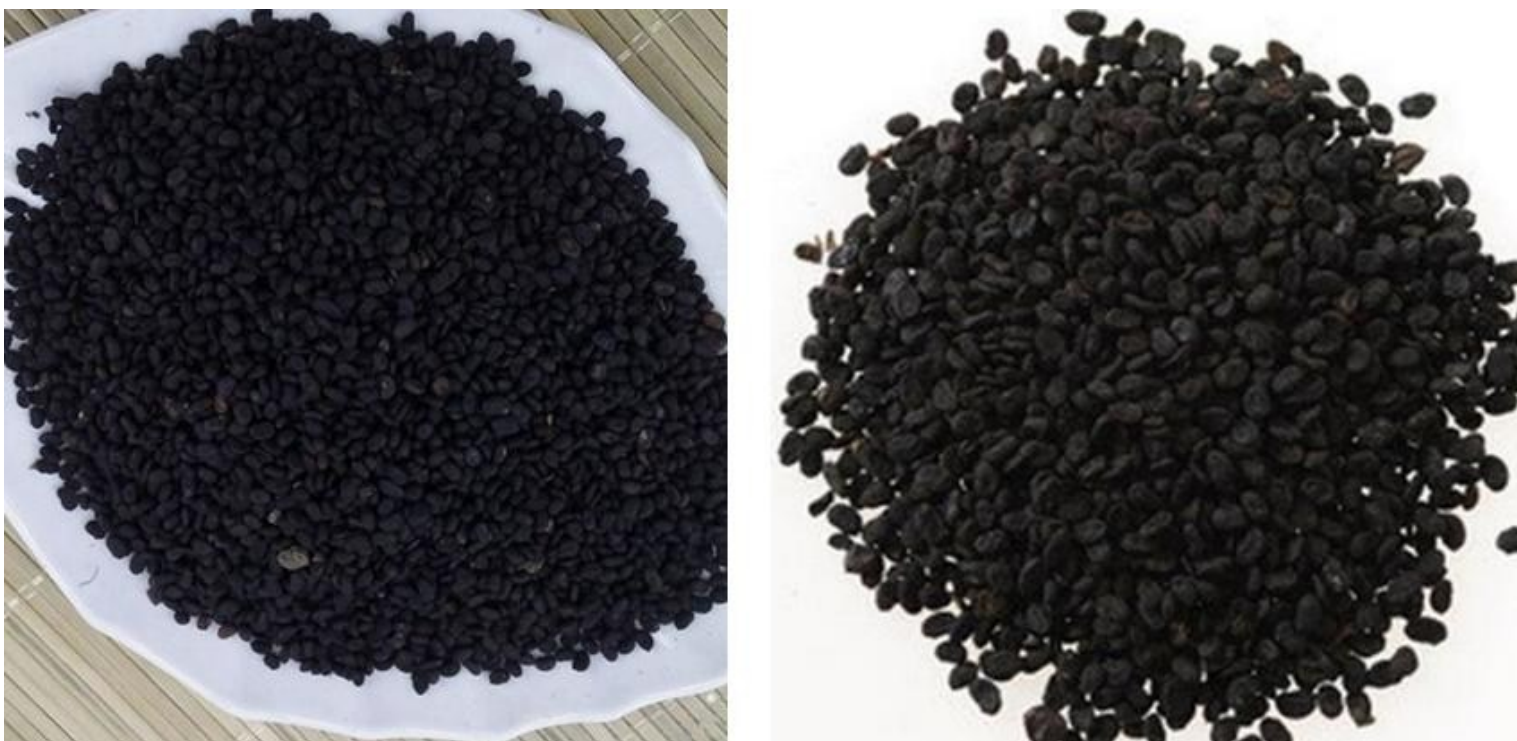

**Fig. S1** *Psoralea corylifolia* seeds

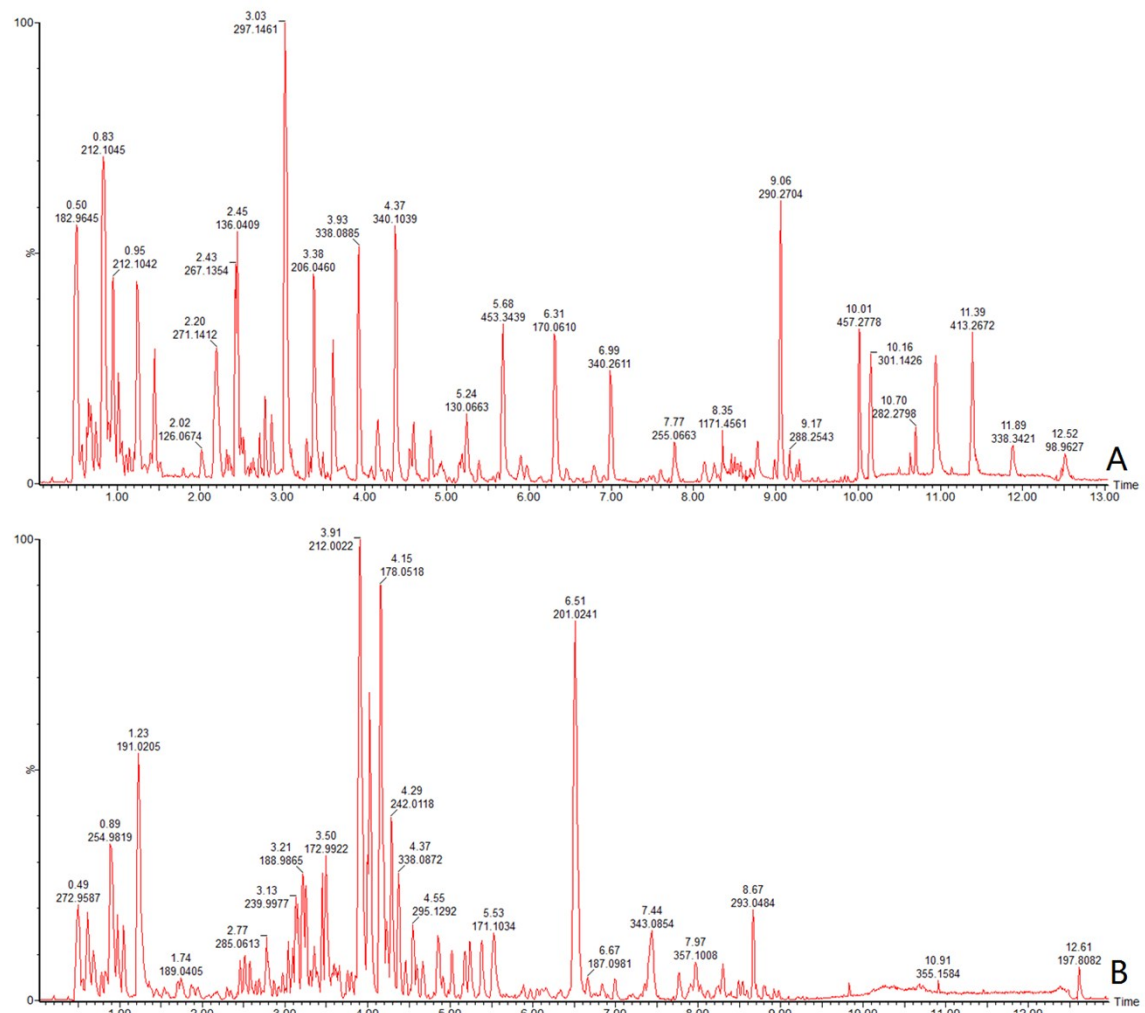

**Fig.S2.** UPLC chromatogram of the PCS samples. (A) Positive ion mode. (B) Negative ion mode.

Table S1: The metabolite signatures information through untargeted liquid chromatography coupled with mass spectrometry.

| Rt/min | M/Z      | Exact mass | Scan mode | M+X  | Proposed composition                                            | Predicting compound                                 | HMDB ID     | Mass Error<br>(ppm) | Chang<br>trend | Callback<br>trend |
|--------|----------|------------|-----------|------|-----------------------------------------------------------------|-----------------------------------------------------|-------------|---------------------|----------------|-------------------|
| 0.67   | 348.0712 | 347.2212   | ESI+      | M+H  | C <sub>10</sub> H <sub>14</sub> N <sub>5</sub> O <sub>7</sub> P | Adenosine monophosphate                             | HMDB0000045 | 2.297               | ↑**            | ##                |
| 0.68   | 300.049  | 301.1877   | ESI-      | M-H  | C <sub>8</sub> H <sub>16</sub> NO <sub>9</sub> P                | N-Acetyl-D-Glucosamine<br>6-Phosphate               | HMDB0001062 | -0.03               | ↑**            |                   |
| 0.78   | 351.073  | 352.2928   | ESI-      | M-H  | C <sub>16</sub> H <sub>16</sub> O <sub>9</sub>                  | Chlorogenoquinone                                   | HMDB0029383 | 2.48                | ↓**            | #                 |
| 0.9    | 259.0974 | 258.2693   | ESI+      | M+H  | C <sub>15</sub> H <sub>14</sub> O <sub>4</sub>                  | O-Desmethylangolensin                               | HMDB0004629 | 3.39                | ↓*             |                   |
| 1.21   | 455.2041 | 454.5122   | ESI+      | M+H  | C <sub>26</sub> H <sub>30</sub> O <sub>7</sub>                  | Desoxylimonin                                       | HMDB0035031 | -5.17               | ↑**            |                   |
| 1.23   | 85.0299  | 86.0892    | ESI-      | M-H  | C <sub>4</sub> H <sub>6</sub> O <sub>2</sub>                    | Gamma-Butyrolactone                                 | HMDB0000549 | 4.25                | ↓**            | ##                |
| 1.23   | 129.0188 | 130.0987   | ESI-      | M-H  | C <sub>5</sub> H <sub>6</sub> O <sub>4</sub>                    | Glutaconic acid                                     | HMDB0000620 | -4.34               | ↓**            | ##                |
| 1.96   | 263.0239 | 264.252    | ESI-      | M-H  | C <sub>9</sub> H <sub>12</sub> O <sub>7</sub> S                 | 3-Methoxy-4-hydroxyphenylethy<br>leneglycol sulfate | HMDB0000559 | 2.95                | ↑**            | #                 |
| 2.43   | 267.1398 | 266.3343   | ESI+      | M+H  | C <sub>18</sub> H <sub>18</sub> O <sub>2</sub>                  | Dienestrol                                          | HMDB0015027 | 7.03                | ↓**            |                   |
| 2.43   | 265.112  | 266.2979   | ESI-      | M-H  | C <sub>15</sub> H <sub>14</sub> N <sub>4</sub> O                | Nevirapine                                          | HMDB0014383 | 4.45                | ↑**            |                   |
| 2.45   | 154.0598 | 131.1332   | ESI+      | M+Na | C <sub>4</sub> H <sub>9</sub> N <sub>3</sub> O <sub>2</sub>     | Creatine                                            | HMDB0000064 | 3.67                | ↓*             | #                 |
| 2.51   | 215.0819 | 216.2359   | ESI-      | M-H  | C <sub>12</sub> H <sub>12</sub> N <sub>2</sub> O <sub>2</sub>   | L-1,2,3,4-Tetrahydro-                               | HMDB0035665 | -3.37               | ↓**            |                   |

| beta-carboline-3-carboxylic acid |          |          |      |     |                                                                 |                                          |             |       |     |    |
|----------------------------------|----------|----------|------|-----|-----------------------------------------------------------------|------------------------------------------|-------------|-------|-----|----|
| 2.51                             | 267.0799 | 268.332  | ESI- | M-H | C <sub>12</sub> H <sub>16</sub> N <sub>2</sub> O <sub>3</sub> S | Cysteinyl-Phenylalanine                  | HMDB0028782 | -3.52 | ↑** |    |
| 2.8                              | 367.1774 | 366.4055 | ESI+ | M+H | C <sub>19</sub> H <sub>26</sub> O <sub>7</sub>                  | Diacetoxyscirpenol                       | HMDB0035104 | 6.14  | ↑** | ## |
| 2.8                              | 276.146  | 275.301  | ESI+ | M+H | C <sub>12</sub> H <sub>21</sub> NO <sub>6</sub>                 | Glutarylcarnitine                        | HMDB0013130 | 6.595 | ↑** | ## |
| 2.8                              | 247.1113 | 246.327  | ESI+ | M+H | C <sub>10</sub> H <sub>18</sub> N <sub>2</sub> O <sub>3</sub> S | Methionyl-Proline                        | HMDB0028981 | 0.72  | ↑** | ## |
| 2.8                              | 228.0061 | 229.617  | ESI- | M-H | C <sub>9</sub> H <sub>8</sub> C <sub>1</sub> NO <sub>4</sub>    | 4-Chloro-6,7-dimethoxy-2-benzoxazolinone | HMDB0034577 | -3.40 | ↑** |    |
| 2.88                             | 302.08   | 302.2788 | ESI+ | M+H | C <sub>16</sub> H <sub>14</sub> O <sub>6</sub>                  | Hesperetin                               | HMDB0005782 | 3.12  | ↓** |    |
| 3.04                             | 220.1205 | 219.2431 | ESI+ | M+H | C <sub>10</sub> H <sub>13</sub> N <sub>5</sub> O                | Cis-zeatin                               | HMDB0012204 | 5.39  | ↓** |    |
| 3.28                             | 278.0815 | 279.29   | ESI- | M-H | C <sub>17</sub> H <sub>13</sub> NO <sub>3</sub>                 | Graveolinine                             | HMDB0030244 | -2.70 | ↑** | ## |
| 3.35                             | 217.0151 | 218.338  | ESI- | M-H | C <sub>12</sub> H <sub>10</sub> S <sub>2</sub>                  | Diphenyl disulfide                       | HMDB0031823 | 0.15  | ↓** | ## |
| 3.62                             | 144.0476 | 143.207  | ESI+ | M+H | C <sub>6</sub> H <sub>9</sub> NOS                               | 2-Propionyl-2-thiazoline                 | HMDB0032493 | -1.08 | ↑*  | ## |
| 3.82                             | 269.0802 | 270.28   | ESI- | M-H | C <sub>16</sub> H <sub>14</sub> O <sub>4</sub>                  | Isomedicarpin                            | HMDB0033305 | -6.44 | ↑** | ## |
| 4.07                             | 366.1682 | 365.4223 | ESI+ | M+H | C <sub>22</sub> H <sub>23</sub> NO <sub>4</sub>                 | Nequinat                                 | HMDB0031754 | -4.86 | ↓** |    |
| 4.16                             | 105.0369 | 104.171  | ESI+ | M+H | C <sub>4</sub> H <sub>8</sub> OS                                | S-Ethyl thioacetate                      | HMDB0031190 | 0.18  | ↓** | #  |
| 4.16                             | 179.0614 | 179.237  | ESI+ | M+H | C <sub>6</sub> H <sub>13</sub> NO <sub>3</sub> S                | Cyclamic acid                            | HMDB0031340 | -1.20 | ↓*  |    |
| 4.56                             | 175.124  | 174.2423 | ESI+ | M+H | C <sub>11</sub> H <sub>14</sub> N <sub>2</sub>                  | N-Methyltryptamine                       | HMDB0004370 | 5.84  | ↓** |    |

|      |          |          |      |     |                                                                 |                                             |             |       |     |    |
|------|----------|----------|------|-----|-----------------------------------------------------------------|---------------------------------------------|-------------|-------|-----|----|
| 4.67 | 91.0575  | 90.187   | ESI+ | M+H | C <sub>4</sub> H <sub>10</sub> S                                | 2-Methyl-1-propanethiol                     | HMDB0031245 | -0.91 | ↑** |    |
| 4.67 | 74.0254  | 75.0666  | ESI- | M-H | C <sub>2</sub> H <sub>5</sub> NO <sub>2</sub>                   | Glycine                                     | HMDB0000123 | 8.75  | ↑** |    |
| 4.69 | 306.1131 | 307.3432 | ESI- | M-H | C <sub>19</sub> H <sub>17</sub> NO <sub>3</sub>                 | N-Acetylanonaine                            | HMDB0030349 | -1.46 | ↑** |    |
| 5.19 | 295.1355 | 296.3603 | ESI- | M-H | C <sub>19</sub> H <sub>20</sub> O <sub>3</sub>                  | Parakmerin A                                | HMDB0033950 | 5.20  | ↓** |    |
| 5.97 | 266.1288 | 266.3343 | ESI+ | M+H | C <sub>18</sub> H <sub>18</sub> O <sub>2</sub>                  | Dienestrol                                  | HMDB0015027 | -7.15 | ↓** | #  |
| 5.97 | 265.1257 | 266.3343 | ESI- | M-H | C <sub>18</sub> H <sub>18</sub> O <sub>2</sub>                  | Dienestrol                                  | HMDB0015027 | 8.49  | ↓** | #  |
| 6.11 | 335.0656 | 334.2192 | ESI+ | M+H | C <sub>11</sub> H <sub>15</sub> N <sub>2</sub> O <sub>8</sub> P | Nicotinamide ribotide                       | HMDB0000229 | 5.23  | ↓** |    |
| 6.27 | 304.1664 | 303.3562 | ESI+ | M+H | C <sub>16</sub> H <sub>21</sub> N <sub>3</sub> O <sub>3</sub>   | Tryptophyl-Valine                           | HMDB0029096 | 2.85  | ↑** |    |
| 6.86 | 389.125  | 390.388  | ESI- | M-H | C <sub>20</sub> H <sub>22</sub> O <sub>8</sub>                  | trans-Piceid                                | HMDB0030564 | 2.01  | ↑** | ## |
| 6.91 | 280.1403 | 280.3196 | ESI+ | M+H | C <sub>14</sub> H <sub>20</sub> N <sub>2</sub> O <sub>4</sub>   | Tyrosyl-Valine                              | HMDB0029118 | -7.01 | ↓** |    |
| 6.91 | 279.1395 | 280.3609 | ESI- | M-H | C <sub>19</sub> H <sub>20</sub> O <sub>2</sub>                  | 7-(4-Hydroxyphenyl)-1-phenyl-4-hepten-3-one | HMDB0033295 | 1.43  | ↓** |    |
| 7.58 | 200.1279 | 199.2469 | ESI+ | M+H | C <sub>10</sub> H <sub>17</sub> NO <sub>3</sub>                 | Ecgonine methyl ester                       | HMDB0006406 | -1.24 | ↑** |    |
| 7.74 | 316.2018 | 315.41   | ESI+ | M+H | C <sub>18</sub> H <sub>25</sub> N <sub>3</sub> O <sub>2</sub>   | Saxagliptin                                 | HMDB0015634 | -0.50 | ↑** | #  |
| 7.77 | 254.0799 | 254.1809 | ESI+ | M+H | C <sub>6</sub> H <sub>15</sub> N <sub>4</sub> O <sub>5</sub> P  | L-Phosphoarginine                           | HMDB0029438 | 7.54  | ↓** |    |
| 8.69 | 392.1841 | 391.4596 | ESI+ | M+H | C <sub>24</sub> H <sub>25</sub> NO <sub>4</sub>                 | Flavoxate                                   | HMDB0015279 | -3.8  | ↓** |    |

---

↑: The content of the model group was higher than that of the control group.

↓: The content of the model group was lower than that of the control group.

\*: Compared with the control group, the content of markers in the model group changed significantly. ( $p < 0.05$ )

\*\* : Compared with the control group, the content of markers in the model group changed extremely significantly. ( $p < 0.01$ )

#: Compared with the model group, the content of markers in treatment group changed significantly. ( $p < 0.05$ )

##: Compared with the model group, the content of markers in treatment group changed extremely significantly. ( $p < 0.01$ )
